# Supplementary material for: Privacy-preserving distributed clustering
Source: Springer Nature journal article supplement (doi:10.1186/1687-417x-2013-4), 2013-11-09

**Service Provider**

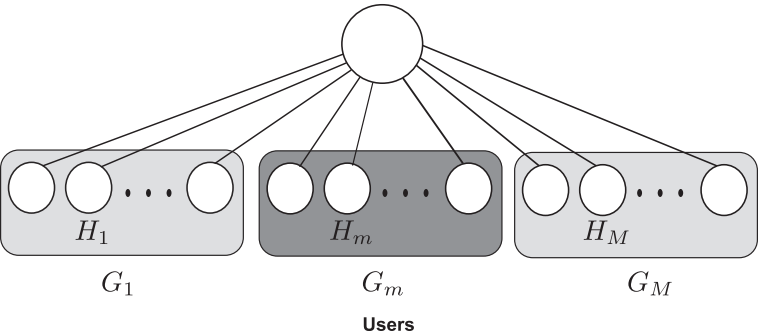

Supplement: 13635_2013_12_MOESM1_ESM.pdf [file 13635_2013_12_MOESM1_ESM.pdf]
