# Supplementary material for: Privacy-preserving distributed clustering
Source: Springer Nature journal article supplement (doi:10.1186/1687-417x-2013-4), 2013-11-09
Supplement: 13635_2013_12_MOESM2_ESM.pdf [file 13635_2013_12_MOESM2_ESM.pdf]

**Input:**  $\phi_m$  such that  $\sum_{m=1}^M \phi_m = 0$

**Input:**  $C_k, k \in \{1, \dots, K\}$

**Input:**  $P_i$

Receives  $\llbracket \psi_{(m,r)} \rrbracket_H$  for  $r \in \{1, \dots, R\}$

and  $m \in \{1, \dots, M\}$

$\llbracket \psi_{(m,r)} \rrbracket_H$  for  $r \in \{1, \dots, R\}$

$\llbracket \tilde{C}^2 \rrbracket_H, \llbracket \tilde{C}_r \rrbracket_H$  for  $r \in \{1, \dots, R\}$

Computes:  $\llbracket \tilde{D}_i^2 \rrbracket_H$

$\llbracket \tilde{D}_i^2 \rrbracket_H$

$\llbracket \tilde{D}_i^2 \rrbracket_H$  for  $i \in G_m$

Decrypts:  $\llbracket \tilde{D}_i^2 \rrbracket_H$

Encrypts:  $\gamma_{(i,j)}$  for  $j \in \{1, \dots, K\}$

$\llbracket \gamma_{(i,j)} \rrbracket_H$  for  $j \in \{1, \dots, K\}$

Computes:  $\llbracket \tilde{\Gamma}_i \rrbracket_H$

$\llbracket \tilde{\Gamma}_i \rrbracket_H$

Computes:  $\llbracket \tilde{S}_{(i,r)} \rrbracket_H$

$\llbracket \tilde{S}_{(i,r)} \rrbracket_H$  for  $r \in \{1, \dots, R\}$

Computes:  $\llbracket \tilde{\Gamma}_{\Sigma_m} \rrbracket_H$  and  $\llbracket \tilde{P}_{\Sigma_{(m,r)}} \rrbracket_H$

Generates:  $\alpha_m$  and  $\beta_{(m,r)}$

$\llbracket \tilde{\Gamma}_{\Sigma_m} + \alpha_m \rrbracket_H, \llbracket \tilde{P}_{\Sigma_{(m,r)}} + \beta_{(m,r)} \rrbracket_H$

Decrypts:  $\llbracket \tilde{\Gamma}_{\Sigma_m} + \alpha_m \rrbracket_H$  and

$\llbracket \tilde{P}_{\Sigma_{(m,r)}} + \beta_{(m,r)} \rrbracket_H$

$\tilde{\Gamma}_{\Sigma_m} + \alpha_m + \phi_m, \tilde{P}_{\Sigma_{(m,r)}} + \beta_{(m,r)} + \psi_{(m,r)}$

Computes:  $\tilde{P}_{\Sigma_r}$  and  $\tilde{\Gamma}_{\Sigma}$
